# Supplementary material for: UBE2T promotes nasopharyngeal carcinoma cell proliferation, invasion, and metastasis by activating the AKT/GSK3β/β-catenin pathway
Source: PubMed Central journal article supplement (PMC4924777; doi:10.18632/oncotarget.7805), 2016-03-01
Supplement: oncotarget-07-15161-s001.pdf [file oncotarget-07-15161-s001.pdf]

SUPPLEMENTARY FIGURES AND TABLES

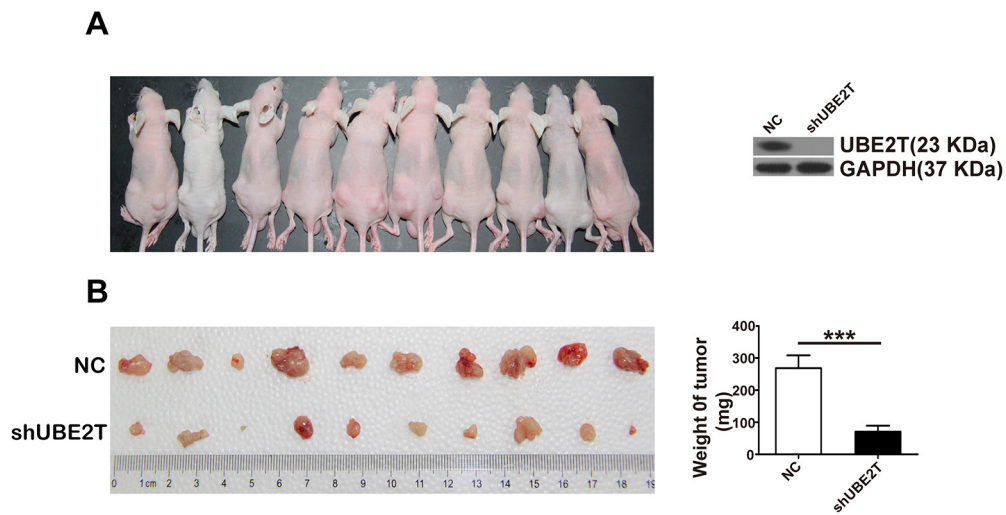

**Supplementary Figure S1: Silencing UBE2T with shRNA inhibited the growth of CNE2 subcutaneous xenografts.** A. Images of nude mice at 10 days after subcutaneously injecting CNE2 cells as shown (left flank: normal control [NC], right flank: shUBE2T). Western blot images show the silence efficiency. B. The images of indicated CNE2 subcutaneous xenografts (left). The graph shows mean  $\pm$  SEM values of xenograft weight (n=10, Student's t-test, \*\*\* $P < 0.001$ ).

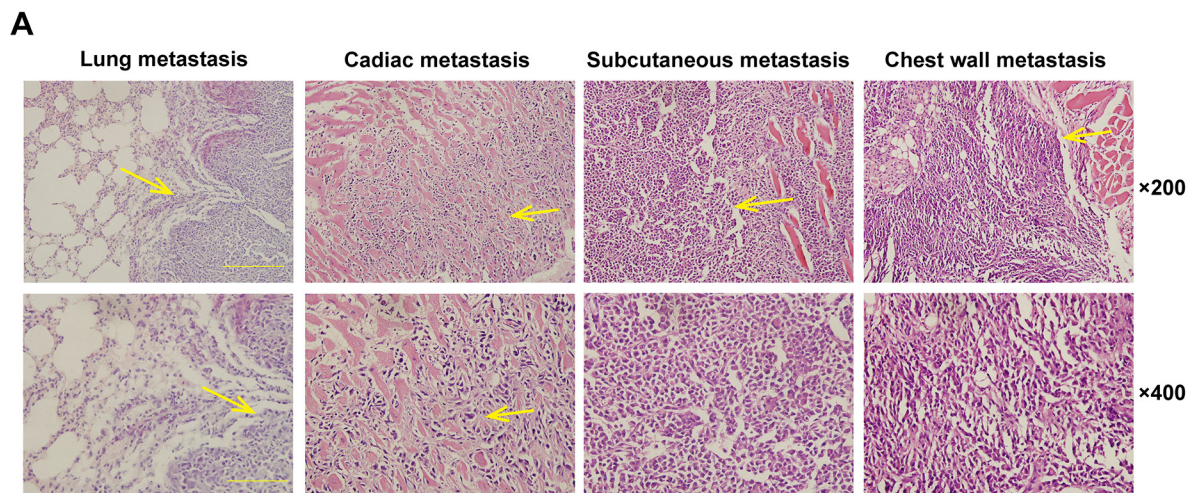

**B**

| Groups            | NC | UBE2T |
|-------------------|----|-------|
| Mice              | 7  | 7     |
| Metastatic organs | 7  | 21    |

**Supplementary Figure S2: A.** Representative images of metastasis under 20/40X objective fields. Scale indicates 200  $\mu$ m in 20X objective and 100  $\mu$ m in 40X objective. Yellow arrows indicate lesions. **B.** The number of total metastatic organs verified by HE staining in each group.

|                                | Low UBE2T expression | High UBE2T expression |
|--------------------------------|----------------------|-----------------------|
| Low p-GSK3 $\beta$ expression  | 5                    | 2                     |
| High p-GSK3 $\beta$ expression | 1                    | 12                    |

**Supplementary Figure S3: The correlation analysis of UBE2T and p-GSK3 $\beta$  in 20 additional NPC samples.** (chi-square test,  $P=0.007$ ).

**Supplementary Table S1: 1992 Fuzhou staging system for nasopharyngeal carcinoma**

---

|                  |                                                                                                                                                                                   |
|------------------|-----------------------------------------------------------------------------------------------------------------------------------------------------------------------------------|
| <b>T1:</b>       | Tumor confined to the nasopharynx                                                                                                                                                 |
| <b>T2:</b>       | Involvement of nasal cavity, oropharynx, soft palatine, anterior cervical vertebrae soft tissue, and parapharyngeal space extension before SO line*                               |
| <b>T3:</b>       | Extension over SO line, involvement of anterior or posterior cranial nerves alone, skull base, pterygopalatine zone, and pterygopalatine fossa                                    |
| <b>T4:</b>       | Involvement of both anterior and posterior cranial nerves, paranasal sinus, cavernous sinus, orbit, infratemporal fossa, and direct invasion of first or second cervical vertebra |
| <b>N0:</b>       | No enlarged lymph node                                                                                                                                                            |
| <b>N1:</b>       | Diameter of upper neck lymph node <4 cm, movable                                                                                                                                  |
| <b>N2:</b>       | Lower neck lymph node or the diameter between 4 and 7 cm                                                                                                                          |
| <b>N3:</b>       | Supraclavicular lymph node or diameter >7 cm or fixed of skin infiltration                                                                                                        |
| <b>M0:</b>       | Absence of distant metastasis                                                                                                                                                     |
| <b>M1:</b>       | Presence of distant metastasis                                                                                                                                                    |
| <b>Stage I</b>   | T1N0M0                                                                                                                                                                            |
| <b>Stage II</b>  | T2N0-1M0, T1-2N1M0                                                                                                                                                                |
| <b>Stage III</b> | T3N0-2M0, T1-3N2M0                                                                                                                                                                |
| <b>Stage IVa</b> | T4N0-3M0, T1-4N3M0                                                                                                                                                                |
| <b>Stage IVb</b> | Any T, any N, M1                                                                                                                                                                  |

---

\* Line connected from the styloid process to the midpoint on posterior edge of the great occipital foramen; border between upper and lower neck is the lower margin of the cricoid cartilage.

**Supplementary Table S2: Clinicopathological parameters of patient samples and UBE2T expression levels in NPC**

|                     | N(%)       |
|---------------------|------------|
| Gender              |            |
| Male                | 109 (73.2) |
| Female              | 40 (26.8)  |
| Age                 |            |
| ≤45                 | 67(45.0)   |
| >45                 | 82(55.0)   |
| T classification    |            |
| T1-T2               | 101 (67.8) |
| T3-T4               | 48 (32.2)  |
| N classification    |            |
| N0                  | 94 (63.1)  |
| N1-N3               | 55 (36.9)  |
| M classification    |            |
| M0                  | 131 (88.9) |
| M1                  | 18 (12.1)  |
| Skull base invasion |            |
| No                  | 125 (83.9) |
| Yes                 | 24 (16.1)  |
| Recurrence          |            |
| No                  | 136 (91.3) |
| Yes                 | 13 (8.7)   |
| Expression of UBE2T |            |
| High expression     | 56 (37.6)  |
| Low expression      | 93 (62.4)  |
